# Supplementary material
Source: publisher site journal article supplement (https://www.dovepress.com/get_supplementary_file.php?f=307821.docx)
Supplement: Supplementary file 1 [file get_supplementary_file.php]

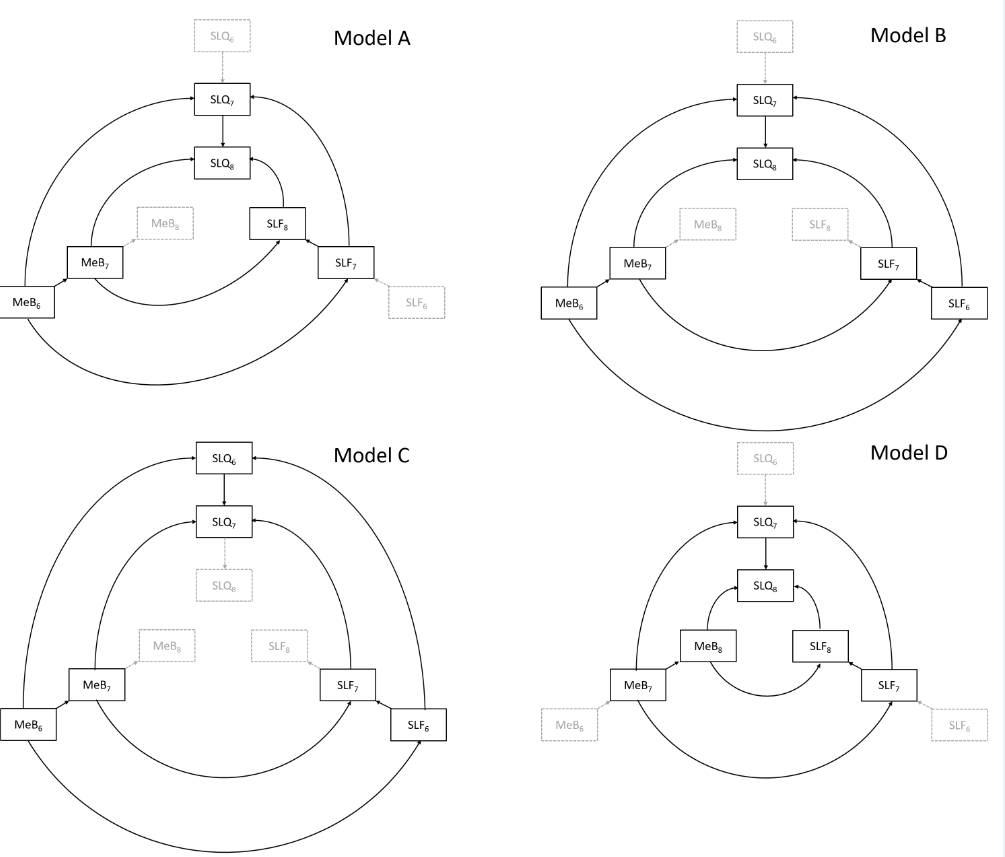


**Supplementary Figure 1.** Models used for mediation analysis. **SQ:** Sleep quality score, **SD/MF:** Sleep duration or Chronotype, **AM/TC/PC/BK:** Media use or book reading.
